# Supplementary material for: Customizing coaxial stacking VS2 nanosheets for dual-band microwave absorption with superior performance in the C- and Ku-bands
Source: Royal Society of Chemistry journal article supplement (doi:10.1039/d0tc00763c), 2020-01-01
Supplement: d0tc00763c1.pdf [file d0tc00763c1.pdf]

### Supporting Information

#### Customizing Coaxial Stacking VS<sub>2</sub> Nanosheets for Dual Band Microwave Absorption with Superior Absorption Performance at C- and K<sub>u</sub>-Bands

Deqing Zhang,<sup>‡ a,c</sup> Huibin Zhang,<sup>‡ a</sup> Junye Cheng,<sup>‡ b</sup> Hassan Raza,<sup>b</sup> Tingting Liu,<sup>a</sup> Xuewei Ba,<sup>a</sup> Guangping Zheng,<sup>\*,b</sup> Guohua Chen,<sup>\*,b</sup> and Maosheng Cao<sup>\*,c</sup>

<sup>a</sup>School of Materials Science and Engineering, Qiqihar University, Qiqihar 161006, China

<sup>b</sup>Department of Mechanical Engineering, Hong Kong Polytechnic University, Hung Hom, Kowloon, Hong Kong, China

<sup>c</sup>School of Materials Science and Engineering, Beijing Institute of Technology, Beijing 100081, China

<sup>‡</sup>These authors contribute equally to this work.

\*E-mail: mmzheng@polyu.edu.hk; guohua.chen@polyu.edu.hk; caomaosheng@bit.edu.cn

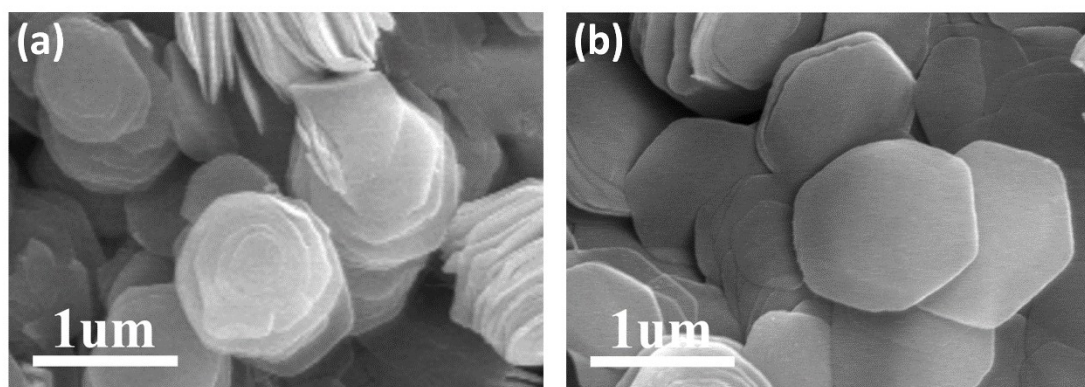

**Figure S1.** SEM images of samples S-170 (a) and S-200 (b).

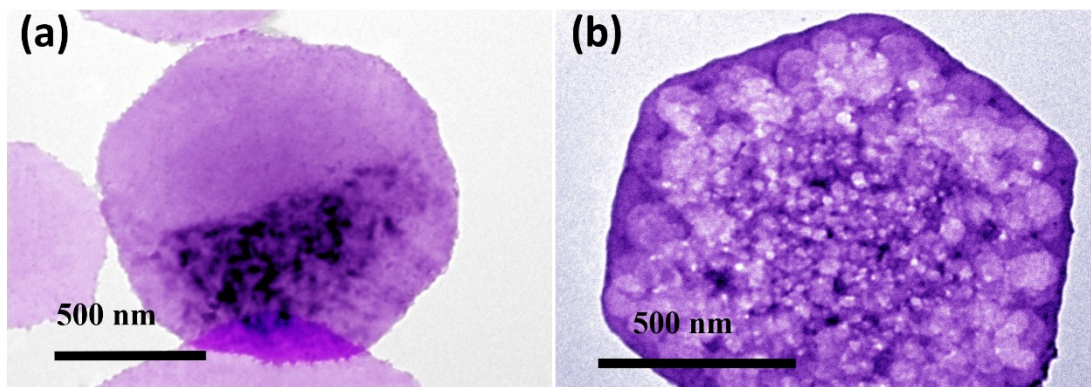

Figure S2. TEM images of samples S-170 (a) and S-200 (b).

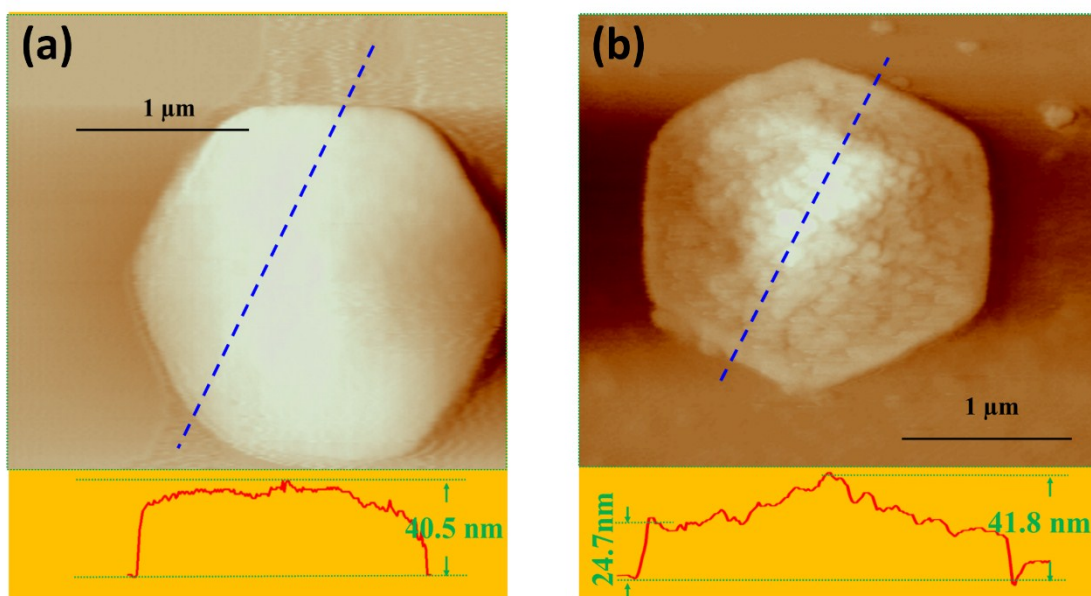

Figure S3. AFM images of typical samples (a) S-170 and (b) S-200.

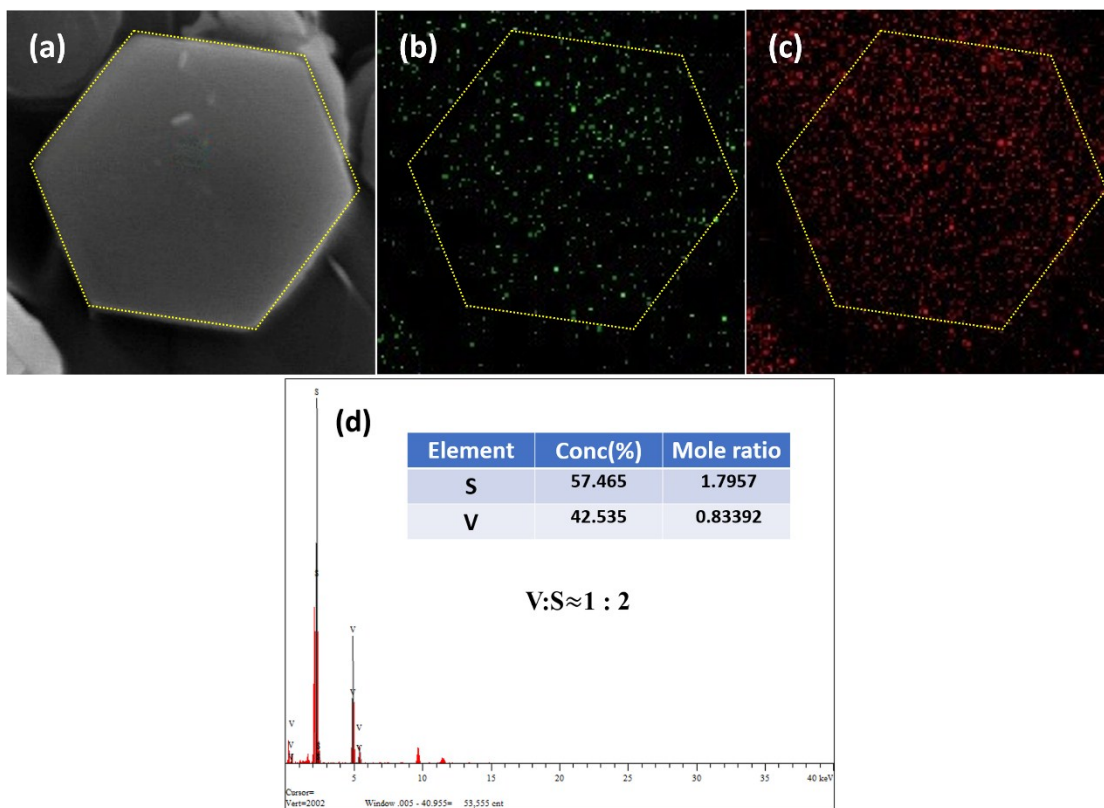

**Figure S4.** Elemental mapping images (a, b, c) and EDS spectra(d) of typical sample S-190.

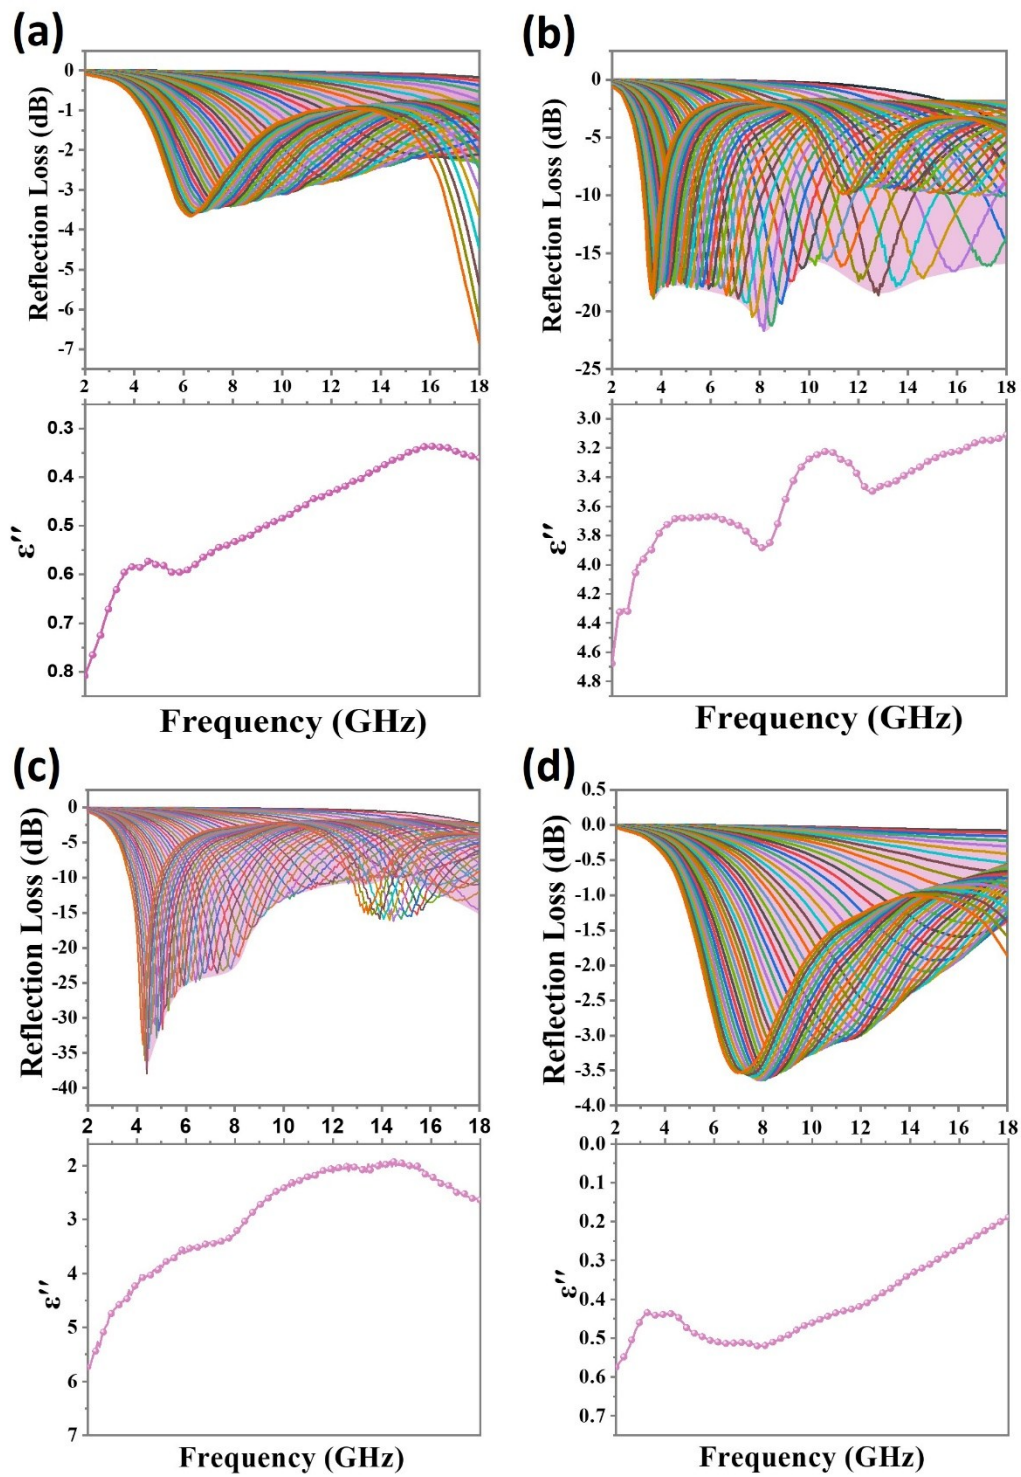

**Figure S5.**  $RL^1$  map (Top picture) in combination with the plots of imaginary part of permittivity (Bottom picture) for samples (a) S-170; (b) S-180; (c) S-190 and (d) S-200.

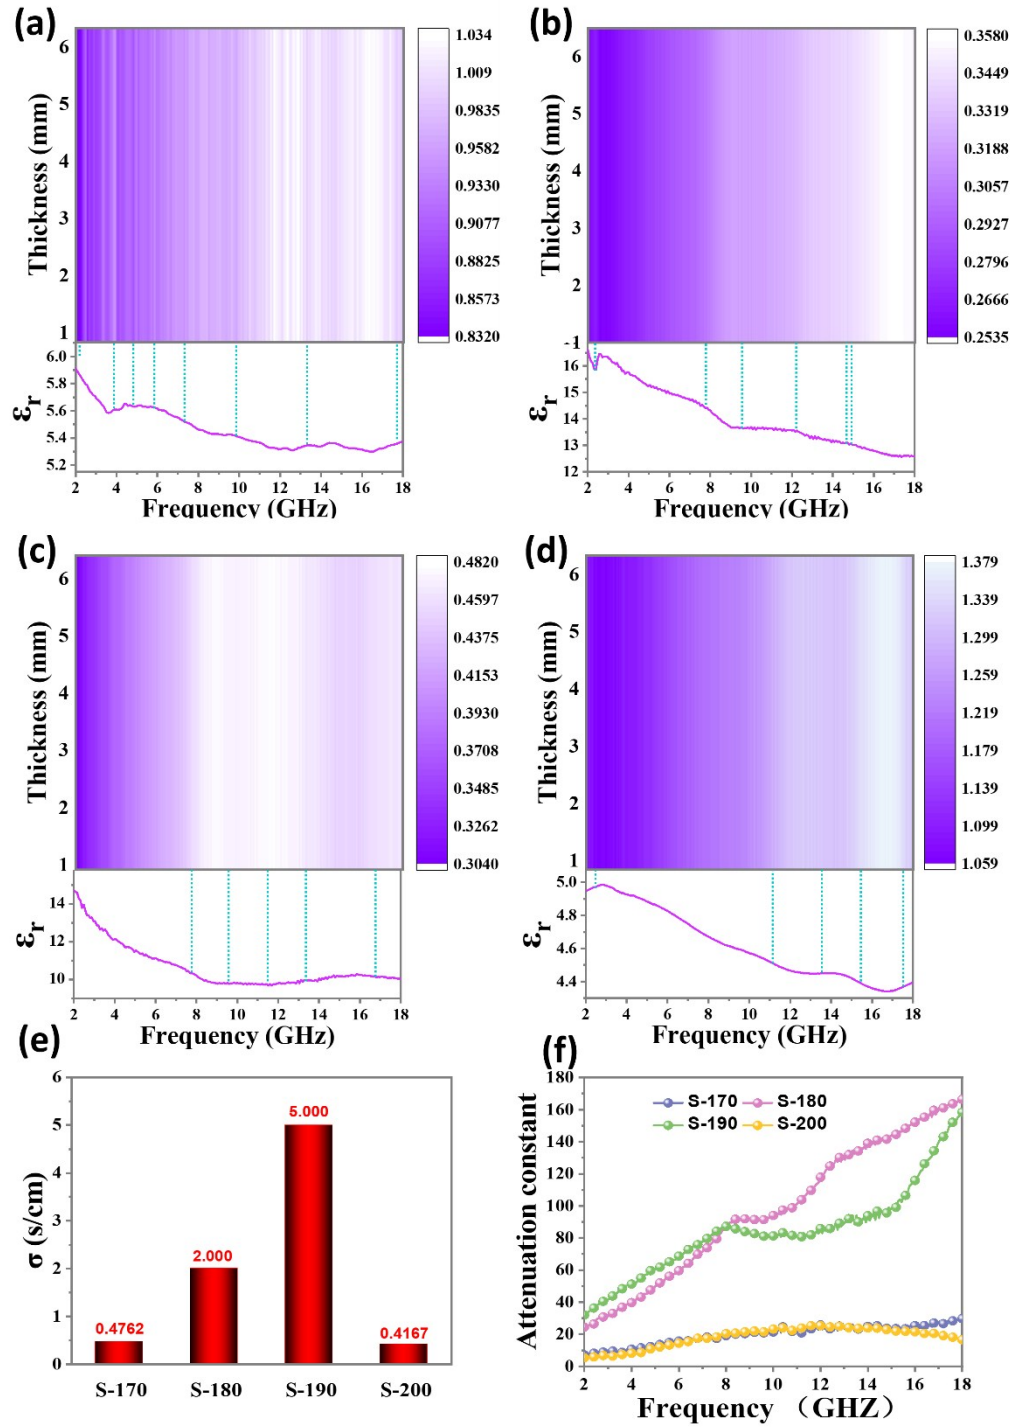

**Figure S6.** The calculated  $|\Delta|$  value maps for  $\text{VS}_2$  samples. (a) S-170; (b) S-180; (c) S-190; (d) S-200; (e) the conductivity and attenuation constants (f) of samples.



**Table S1.** Microwave absorbing performance of some previous materials.

| Filler                        | loading ratio (wt %) | RL (dB) | Thickness (mm) | Frequency (GHz) | Maximal RL (dB) | Frequency of Maximal RL (GHz) | Thickness of Maximal RL (mm) | Ref   |
|-------------------------------|----------------------|---------|----------------|-----------------|-----------------|-------------------------------|------------------------------|-------|
| WS <sub>2</sub> +RGO          | 40                   | -27     | 5.5            | 10.5            | -41.5           | 10.5                          | 2.5                          | [S1]  |
| Flower-like MoSe <sub>2</sub> | 50                   | -19     | 7.8            | 3.2             | -51.6           | 6.1                           | 4.45                         | [S2]  |
| MoS <sub>2</sub> nanosheets   | 60                   | -45     | 2.3            | 12.1            | -47.8           | 12.9                          | 2.2                          | [S3]  |
| 3D MoS <sub>2</sub>           | 25                   | -26.11  | 2.5            | 11.36           | --              | --                            | --                           | [S4]  |
| 2D few layers WS <sub>2</sub> | 30                   | -37     | 6.0            | 4.3             | -63             | 12.1                          | 2.5                          | [S5]  |
| Pure WS <sub>2</sub>          | 35                   | -26     | 2.5            | 11.2            | -47.1           | 12.9                          | 2.2                          | [S6]  |
| MoS <sub>2</sub> -graphene    | 10                   | -8      | 7.0            | 9.5             | -24.2           | 13.3                          | 5.5                          | [S7]  |
| 2D MoS <sub>2</sub> -graphene | 30                   | --      | 5.4            | 16.1            | -41.9           | 16.2                          | 2.4                          | [S8]  |
| MoS <sub>2</sub> -RGO         | 10                   | -27     | 4              | 6.5             | -50.9           | 11.6                          | 2.3                          | [S9]  |
| MoS <sub>2</sub> + RGO        | 60                   | -30     | 2.6            | 10              | -38.42          | 11.17                         | 2.4                          | [S10] |
| MoS <sub>2</sub> + RGO        | 20                   | -32     | 3.5            | 6.8             | -55.3           | 12.8                          | 1.5                          | [S11] |
| MoS <sub>2</sub> + MWCNTs     | 30                   | -16     | 5.0            | 5.9             | -14             | 15                            | 2.0                          | [S12] |
| MoS <sub>2</sub> +PANI        | 40                   | -18     | 2.0            | 5.8             | -40.79          | 14.01                         | 4.5                          | [S13] |
| Graphene Aerogel              | 30                   | --      | --             | --              | -61.09          | 9.9                           | 4.81                         | [S14] |
| Carbon hollow spheres         | 20                   | -43     | 4.0            | 8.9             | -50.9           | 11.1                          | 3.2                          | [S15] |
| Carbon hollow microsphere     | 20                   | -22     | 5.0            | 6.0             | -39.4           | 8.2                           | 3.6                          | [S16] |
| 3D carbon foams               | 30                   | -17     | 5.0            | 5.5             | -52.6           | 15.8                          | 2.6                          | [S17] |

**Table S2.** The band gaps of the monolayer and bulk transition metal dichalcogenide.

| Material          | Monolayer | Bulk    | Ref   |
|-------------------|-----------|---------|-------|
| VS <sub>2</sub>   | 0.6 eV    |         | [S18] |
| WS <sub>2</sub>   | 1.3 eV    | 2.1 eV  | [S19] |
| MoS <sub>2</sub>  | 1.2 eV    | 1.9 eV  | [S19] |
| MoSe <sub>2</sub> | 1.09 eV   | 1.44 eV | [S20] |
| WSe <sub>2</sub>  | 1.13 eV   | 1.56 eV | [S20] |
| MoTe <sub>2</sub> |           | 0.57eV  | [S21] |

## References

- [S1] D. Q. Zhang, T. T. Liu, J. Y. Cheng, Q. Cao, G. P. Zheng, S. Liang, H. Wang, M. S. Cao, *Nano-micro Letters*, **2019**, *11*, 38.
- [S2] Y. Cheng, Y. Zhao, H. Q. Zhao, H. L. Lv, X. D. Qi, J. M. Cao, G. B. Ji, Y. W. Du, *Chem. Eng. J.*, **2019**, 372, 390-398.
- [S3] X. H. Liang, X. M. Zhang, W. Liu, D. M. Tang, B. S. Zhang, G. B. Ji, *J. Mater. Chem. C*, **2016**, *4*, 6816-6821.
- [S4] X. J. Zhang, S. Li, S. W. Wang, Z. J. Yin, J. Q. Zhu, A. P. Guo, G. S. Wang, P. G. Yin, L. Guo, *J. Phys. Chem. C*, **2016**, *120*, 22019-22027.
- [S5] F. Wu, Y. L. Xia, M. X. Sun, A. M. Xie, *Appl. Phys. Lett.*, **2018**, *113*, 052906.
- [S6] W. Ding, L. Hu, Q. C. Liu, Z. G. Sheng, J. M. Dai, X. B. Zhu, Y. P. Sun, *Appl. Phys. Lett.*, **2018**, *113*, 243102.
- [S7] L. Z. Bai, Y. H. Wang, F. Li, D. An, Z. Y. Zhang, Y. Q. Liu, *J. Sol-Gel Sci. Techn.*, **2017**, *84*, 104-109.
- [S8] X. Wang, W. L. Zhang, X. Q. Jia, B. Q. Zhang, M. X. Yu, W. Zhang, J. Q. Liu, *RSC Adv.*, **2016**, *6*, 106187-106193.
- [S9] Y. F. Wang, D. L. Chen, X. Yin, P. Xu, F. Wu, M. He, *ACS Appl. Mater. Inter.*, **2015**, *7*, 26226-26234.
- [S10] M. Q. Ning, B. Y. Kuang, Z. L. Hou, L. Wang, J. B. Li, Y. J. Zhao, H. B. Jin, *Nanoscale*, **2018**, *7*, 15734-15740.
- [S11] D. Q. Zhang, Y. X. Jia, J. Y. Cheng, S. M. Chen, J. X. Chai, X. Y. Yang, Z. Y. Wu, H. Wang, W. J. Zhang, Z. L. Zhao, C. Han, M. S. Cao, G. P. Zheng, *J. Alloy. Compd.*, **2018**, 758, 62-71.
- [S12] L. L. Liu, S. Zhang, F. Yan, C. Y. Li, C. L. Zhu, X. T. Zhang, Y. J. Chen, *ACS Appl. Mater. Inter.*, **2018**, *10*, 14108-14115.
- [S13] J. L. Yang, M. Q. Ye, A. J. Han, Y. Zhang, K. Zhang, *J. Mater. Sci-Mater. El.*, **2018**, *30*, 292-301.
- [S14] Z. C. Wang, R. B. Wei, J. W. Gu, H. Liu, C. T. Liu, C. J. Luo, J. Kong, Q. Shao, N. Wang, Z. H. Guo, X. B. Liu, *Carbon*, **2018**, *139*, 1126-1135.
- [S15] Y. Cheng, Z. Y. Li, Y. Li, S. S. Dai, G. B. Ji, H. Q. Zhao, J. M. Cao, Y. W. Du, *Carbon*, **2018**, *127*, 643-652.
- [S16] H. X. Zhang, B. B. Wang, A. L. Feng, N. Zhang, Z. R. Jia, Z. Y. Huang, X. H. Liu, G. L. Wu, *Compos. Part B*, **2019**, *167*, 690-699.
- [S17] X. F. Zhou, Z. R. Jia, A. L. Feng, X. X. Wang, J. X. Liu, M. Zhang, H. J. Cao, G. L. Wu, *Carbon*, **2019**, *152*, 827-836.
- [S18] Z. Y. Ding, J. H. Peng, X. Xie, J. W. Hu, H. Q. Yang, F. G. Wu, H. F. Dong, *Solid State Commun.*, **2017**, *266*, 26.
- [S19] M. S. Cao, J. C. Shu, X. X. Wang, X. Wang, M. Zhang, H. J. Yang, X. Y. Fang, J. Yuan, *Ann. Phys-Berlin.*, **2019**, *531*, 1800390.
- [S20] Y. Zhang, F. L. Tang, H. T. Xue, W. J. Lu, J. F. Liu, M. Huang, *Physica E.*, **2015**, *66*, 342.
- [S21] A. Bera, A. Singh, D. V. S. Muthu, U. V. Waghmare, A. K. Sood, *J. Phys-Condens. Mat.*, **2017**, *29*, 10.
